# Supplementary material
Source: publisher figshare collection journal article supplement (https://gsapubs.figshare.com/ndownloader/files/23298608)
Supplement: Supplementary file 1 [file 23298608]

1    **Supplementary Information to “Global perturbation of the carbon**  
2    **cycle at the onset of the Miocene climatic optimum”**

3

4            Our study is based on lower to middle Miocene marine sediments recovered at  
5    IODP Site U1337 (3°50.009'N, 123°12.352'W; 4200 m water depth) in the eastern  
6    equatorial Pacific Ocean during the Pacific Equatorial Age Transect (PEAT)  
7    Expedition 321 ([Supplementary Fig. S1](#)). Detailed site location, core recovery and  
8    lithological descriptions are provided in Pälike et al. (2010). This work extends  
9    middle Miocene benthic foraminiferal isotope studies in Site U1337 (Tian et al.,  
10    2013) and Site U1338 (Holbourn et al., 2014).

11

12    **Sampling strategy**

13            Cores were sampled in 10 cm intervals (~5 kyr time resolution) from a  
14    composite sequence (shipboard splice) from Holes U1337A, U1337C and U1337D  
15    (334.46 – 440.43 meters composite depth). Samples were oven dried at 40°C, washed  
16    over a 63 µm sieve, then oven dried at 40°C on a sheet of filter paper.

17

18    **Astronomically-tuned chronology**

19            Astronomical tuning and calculation of sedimentation rates were performed  
20    with AnalySeries 2.0.4.2 (Paillard et al., 1996). We correlated  $\delta^{18}\text{O}$  minima to  
21    ET+0.2P maxima, following a minimal tuning strategy to preserve original spectral  
22    characteristics. The benthic isotope data set from Site U1337 is plotted against  
23    composite depth and against age in [Supplementary Fig. S2](#). Age tie points between  
24    the  $\delta^{18}\text{O}$  series and the ETP target (Laskar et al., 2004) are shown in [Supplementary](#)

Fig. S2 and Supplementary Table S1. The average sedimentation rate is  $\sim 2 \text{ cm kyr}^{-1}$ , corresponding to an average chronological resolution of  $\sim 5 \text{ kyr}$ .

Comparison of the  $\delta^{18}\text{O}$  curves plotted against depth and age shows that original spectral characteristics are retained following the tuning procedure. We note that the short eccentricity cycle (100 kyr) is prominently imprinted in the  $\delta^{18}\text{O}$  and  $\delta^{13}\text{C}$  records (Supplementary Figs. S2-S3). Superimposed on higher frequency variations, the 400 kyr eccentricity cycle is additionally encoded in the  $\delta^{13}\text{C}$  record (Supplementary Fig. S3). The detection of the 100 and 400 kyr eccentricity cycles in the  $\delta^{13}\text{C}$  series supports the age model, based on independent tuning of the  $\delta^{18}\text{O}$  series.

Comparison of astronomically-calibrated benthic isotope series from Site U1337 and subantarctic Atlantic Ocean Site 1090 (Billups et al., 2002; 2004) indicates that the independent age models are overall compatible (Supplementary Fig. S4). The marked  $\delta^{18}\text{O}$  and  $\delta^{13}\text{C}$  decreases marking the onset of the MCO in Site U1337 are identified in Site 1090, further supporting the global nature of these events. The apparent temporal offset at the onset of the  $\delta^{18}\text{O}$  and  $\delta^{13}\text{C}$  decreases is most likely due to the incompleteness of the Site 1090 over this interval.

#### **Benthic foraminiferal and bulk carbonate $\delta^{18}\text{O}$ and $\delta^{13}\text{C}$**

Between 17.2 and 15.5 Ma, benthic foraminiferal and bulk carbonate  $\delta^{18}\text{O}$  have means of 1.33 ‰ and -0.25 ‰ with standard deviation of 0.30 ‰, and 0.29 ‰, respectively. Benthic and bulk carbonate  $\delta^{13}\text{C}$  have means of 1.13 ‰ and 1.94 ‰ with standard deviation of 0.33 and 0.29 ‰, respectively. The offset in mean values reflects the different origins of the source materials, as the bulk carbonate (lighter

49  $\delta^{18}\text{O}$ , heavier  $\delta^{13}\text{C}$ ) represents a near surface signal, primarily based on calcareous  
50 nannofossils derived from surface-dwelling algae. The benthic and bulk carbonate  
51  $\delta^{18}\text{O}$  and  $\delta^{13}\text{C}$  records show a marked co-variance in the 100 kyr eccentricity band  
52 from 17.2 to 15.5 Ma (Fig. 2, Supplementary Figs. S2-S3). This is particularly  
53 striking for the prominent  $\delta^{18}\text{O}$  minima at 16 and 15.6 Ma, which coincide with sharp  
54  $\delta^{13}\text{C}$  minima.

55 We checked the abundance, distribution and preservation of calcareous  
56 nannofossils in selected samples with different carbonate contents, using a scanning  
57 electron microscope. We found that abundance decreased slightly with carbonate  
58 content, but that assemblage composition (size and taxonomic groups) and  
59 preservation did not differ markedly. Thus, we concluded that the bulk carbonate  
60 isotope signals are not primarily influenced by changes in assemblage composition  
61 due to selective dissolution.

62

## 63 REFERENCES

- 64 Billups, K., Channell, J.E.T., and Zachos, J., 2002, Late Oligocene to early Miocene  
65 geochronology and paleoceanography from the sub-Antarctic South Atlantic:  
66 Paleoceanography, v. 17, 1004, doi:10.1029/2000PA000568.
- 67 Billups, K., Pälike, H., Channell, J.E.T., Zachos, J.C., and Shackleton, N.J., 2004,  
68 Astronomic calibration of the late Oligocene through early Miocene geomagnetic  
69 polarity time scale: Earth and Planetary Science Letters, v. 224, p. 33-44,  
70 doi:10.1016/j.epsl.2004.05.004.
- 71 Holbourn, A.E., Kuhnt, W., Lyle, M.W., Schneider, L., Romero, O., and Andersen.  
72 N., 2014, Middle Miocene climate cooling linked to intensification of eastern  
73 equatorial Pacific upwelling: Geology, v. 42, p. 19-22, doi:10.1130/G34890.1.

- Laskar, J., Robutel, P., Joutel, F., Gastineau, M., Correia, A., and Levrard, B., 2004,  
A long-term numerical solution for the insolation quantities of the Earth:  
Astronomy and Astrophysics, v. 428, p. 261-285, doi:10.1051/0004-  
6361:20041335.
- Paillard, D., Labeyrie, L., and Yiou, P., 1996, Macintosh program performs time-  
series analysis: EOS Transactions AGU, v. 77, p. 379.
- Pälike, H., Lyle, M.W., Nishi, H., Raffi, I., Gamage, K., Klaus, A., and the Expedition  
320/321 Scientists, 2010, Proceedings of the Integrated Ocean Drilling Program,  
320/321: Tokyo, Integrated Ocean Drilling Program Management International,  
Inc., doi:10.2204/iodp.proc.320321.109.2010.
- Tian, J., Yang, M., Lyle, M.W., Wilkens, R., and Schackford, J.K., 2013, Obliquity  
and long eccentricity pacing of the Middle Miocene climate transition:  
Geochemistry, Geophysics, Geosystems, v. 14, p. 1740-1755,  
doi:10.1002/ggge.20108.
- Woodruff, F., and Savin, S., 1991, Mid-Miocene isotope stratigraphy in the deep sea:  
high resolution correlations, paleoclimatic cycles, and sediment preservation:  
Paleoceanography, v. 6, p. 755-806.

## CAPTIONS FOR SUPPLEMENTARY FIGURES AND TABLE

**Supplementary Figure 1.** Map showing the present day location of IODP Site U1337  
in the eastern equatorial Pacific (3°50.009'N, 123°12.352'W; 4200 m water depth).  
Site U1337 was located SW of its present position, within  $\pm 2^\circ$  of the Equator between  
8 and 24 Ma (Pälike et al., 2010).

**Supplementary Figure 2.** (a) U1337 benthic  $\delta^{18}\text{O}$  versus meters composite depth (mcd). (b) Comparison of 400 kyr filtered eccentricity (centered at frequency 0.0025 with bandwidth 0.0005) and benthic  $\delta^{13}\text{C}$ . (c) Sedimentation rates. (d) U1337 benthic  $\delta^{18}\text{O}$  versus age. (e) Eccentricity-tilt-precession (ETP) tuning target from Laskar et al. (2004). Tie points are indicated by black crosses.

**Supplementary Figure 3.** (a) Comparison of 400 kyr filtered eccentricity (centered at frequency 0.0025 with bandwidth 0.0005) and benthic  $\delta^{13}\text{C}$ . (b) Comparison of 100 kyr filtered eccentricity (centered at frequency 0.01 with bandwidth 0.004) and benthic  $\delta^{13}\text{C}$  from IODP Site U1337. (c) Benthic  $\delta^{13}\text{C}$  from IODP Site U1337.

**Supplementary Figure 4.** Comparison of U1337 benthic  $\delta^{18}\text{O}$  and  $\delta^{13}\text{C}$  with independently age calibrated records from ODP Site 1090, subantarctic Atlantic Ocean (Billups et al., 2002; 2004). (a) Benthic  $\delta^{13}\text{C}$  from ODP Site 1090. (b) Benthic  $\delta^{13}\text{C}$  from IODP Site U1337. (c) Benthic  $\delta^{18}\text{O}$  from ODP Site 1090. (d) Benthic  $\delta^{18}\text{O}$  from IODP Site U1337. PDB: PeeDee Belemnite, MCO: Miocene Climatic Optimum. Purple crosses mark prominent correlative features. Lilac shading marks sharp  $\delta^{18}\text{O}$  decreases coincident with negative shift in  $\delta^{13}\text{C}$  (shaded orange).

**Supplementary Table 1.** Age control points used to derive astronomically tuned timescale in IODP Site U1337.

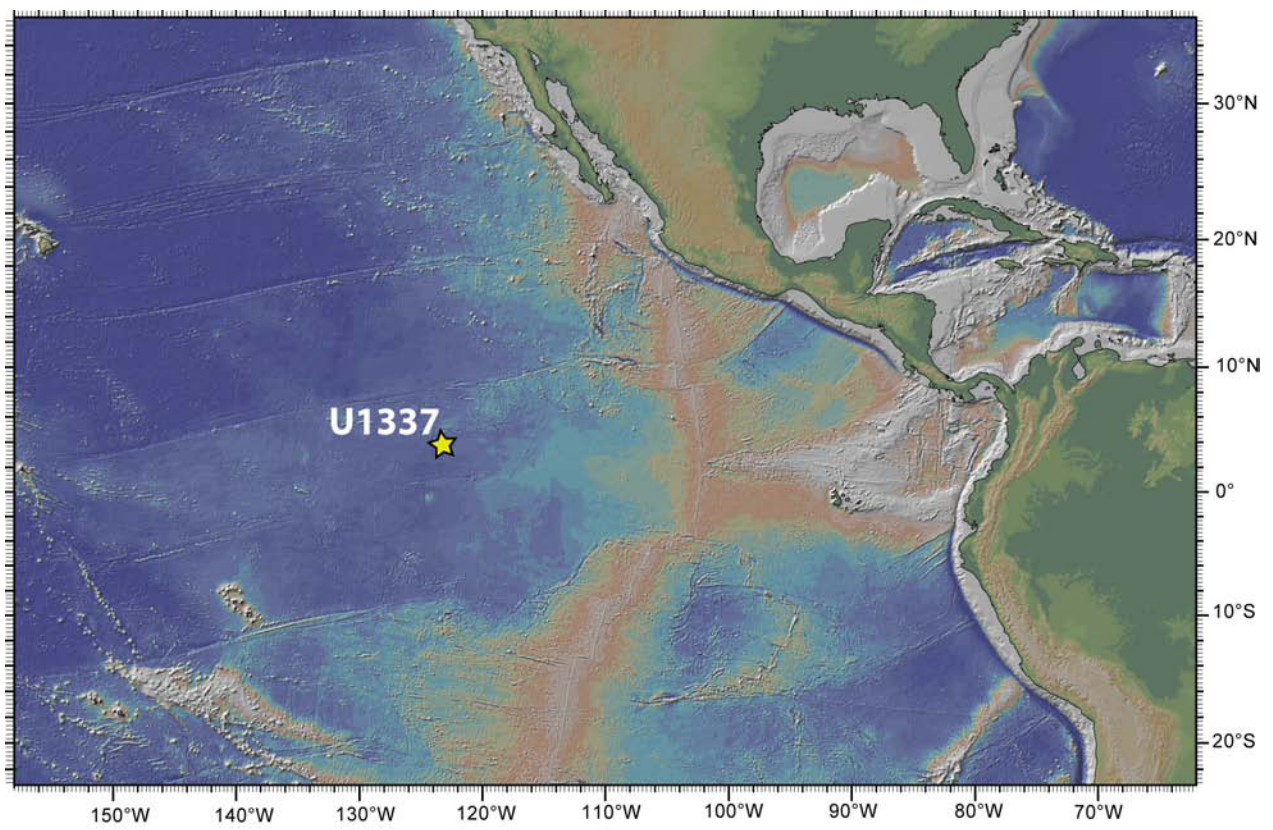

Supplementary Figure S1



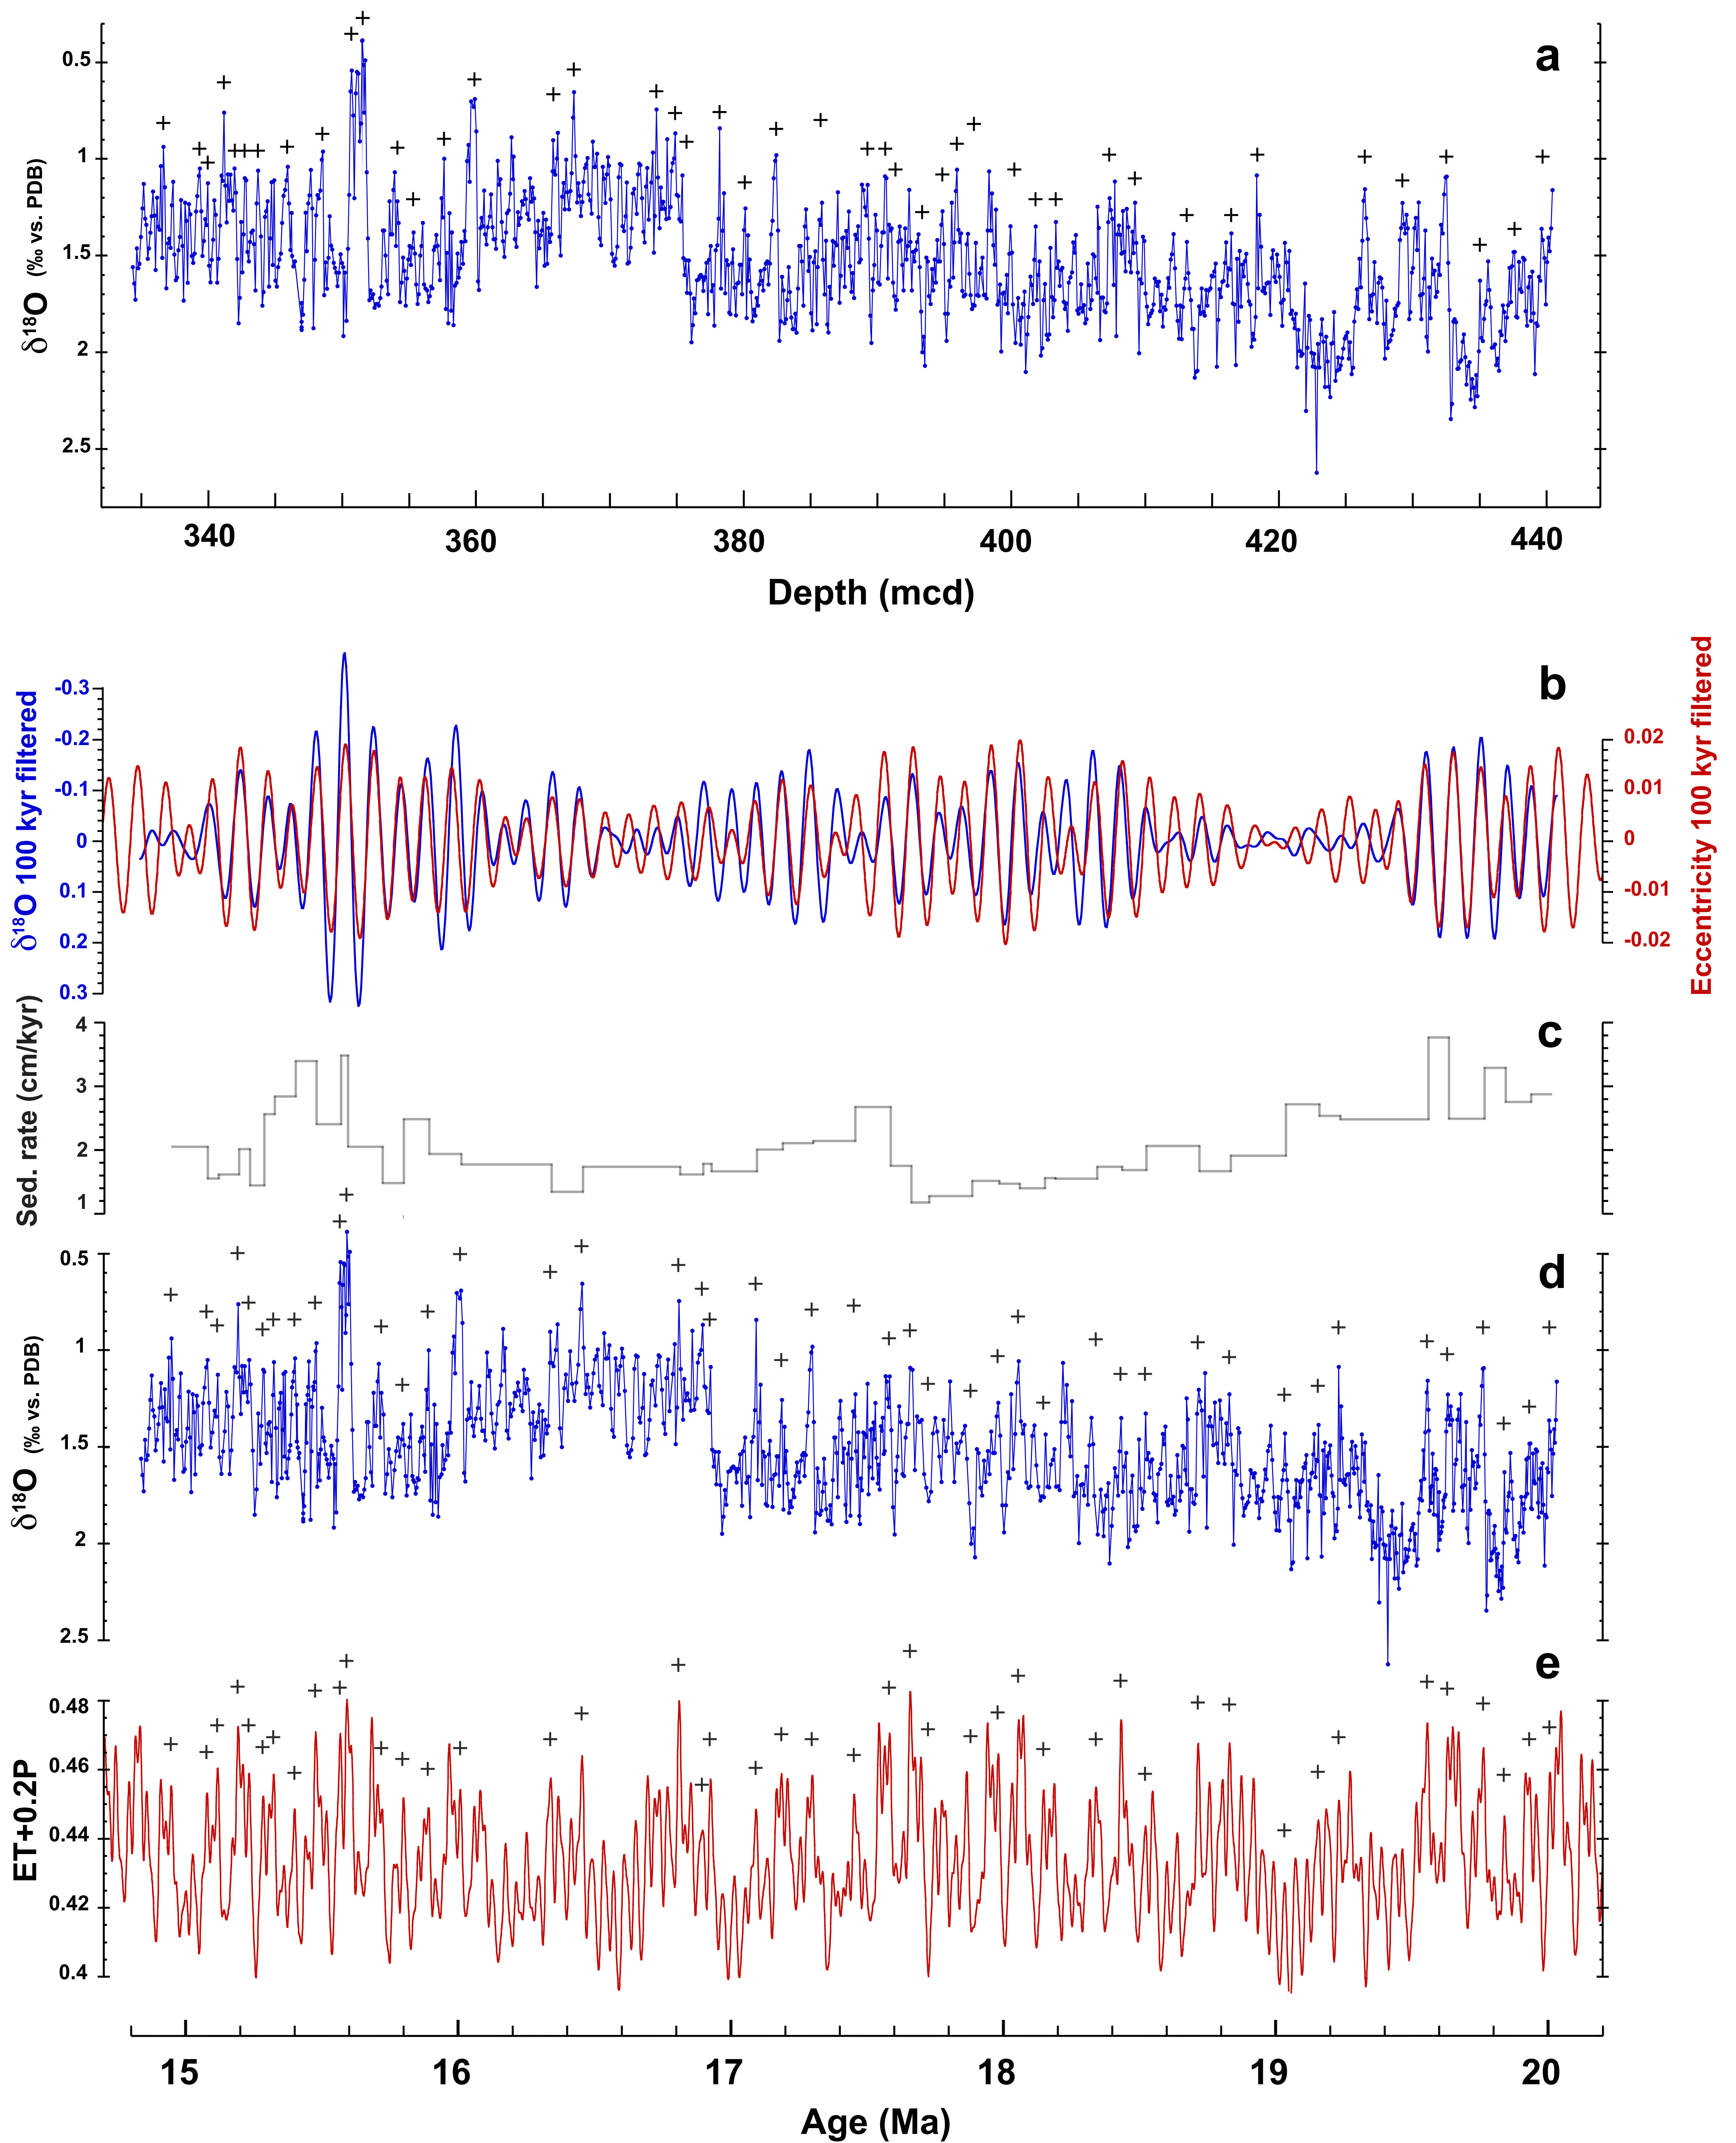

Supplementary Figure S2

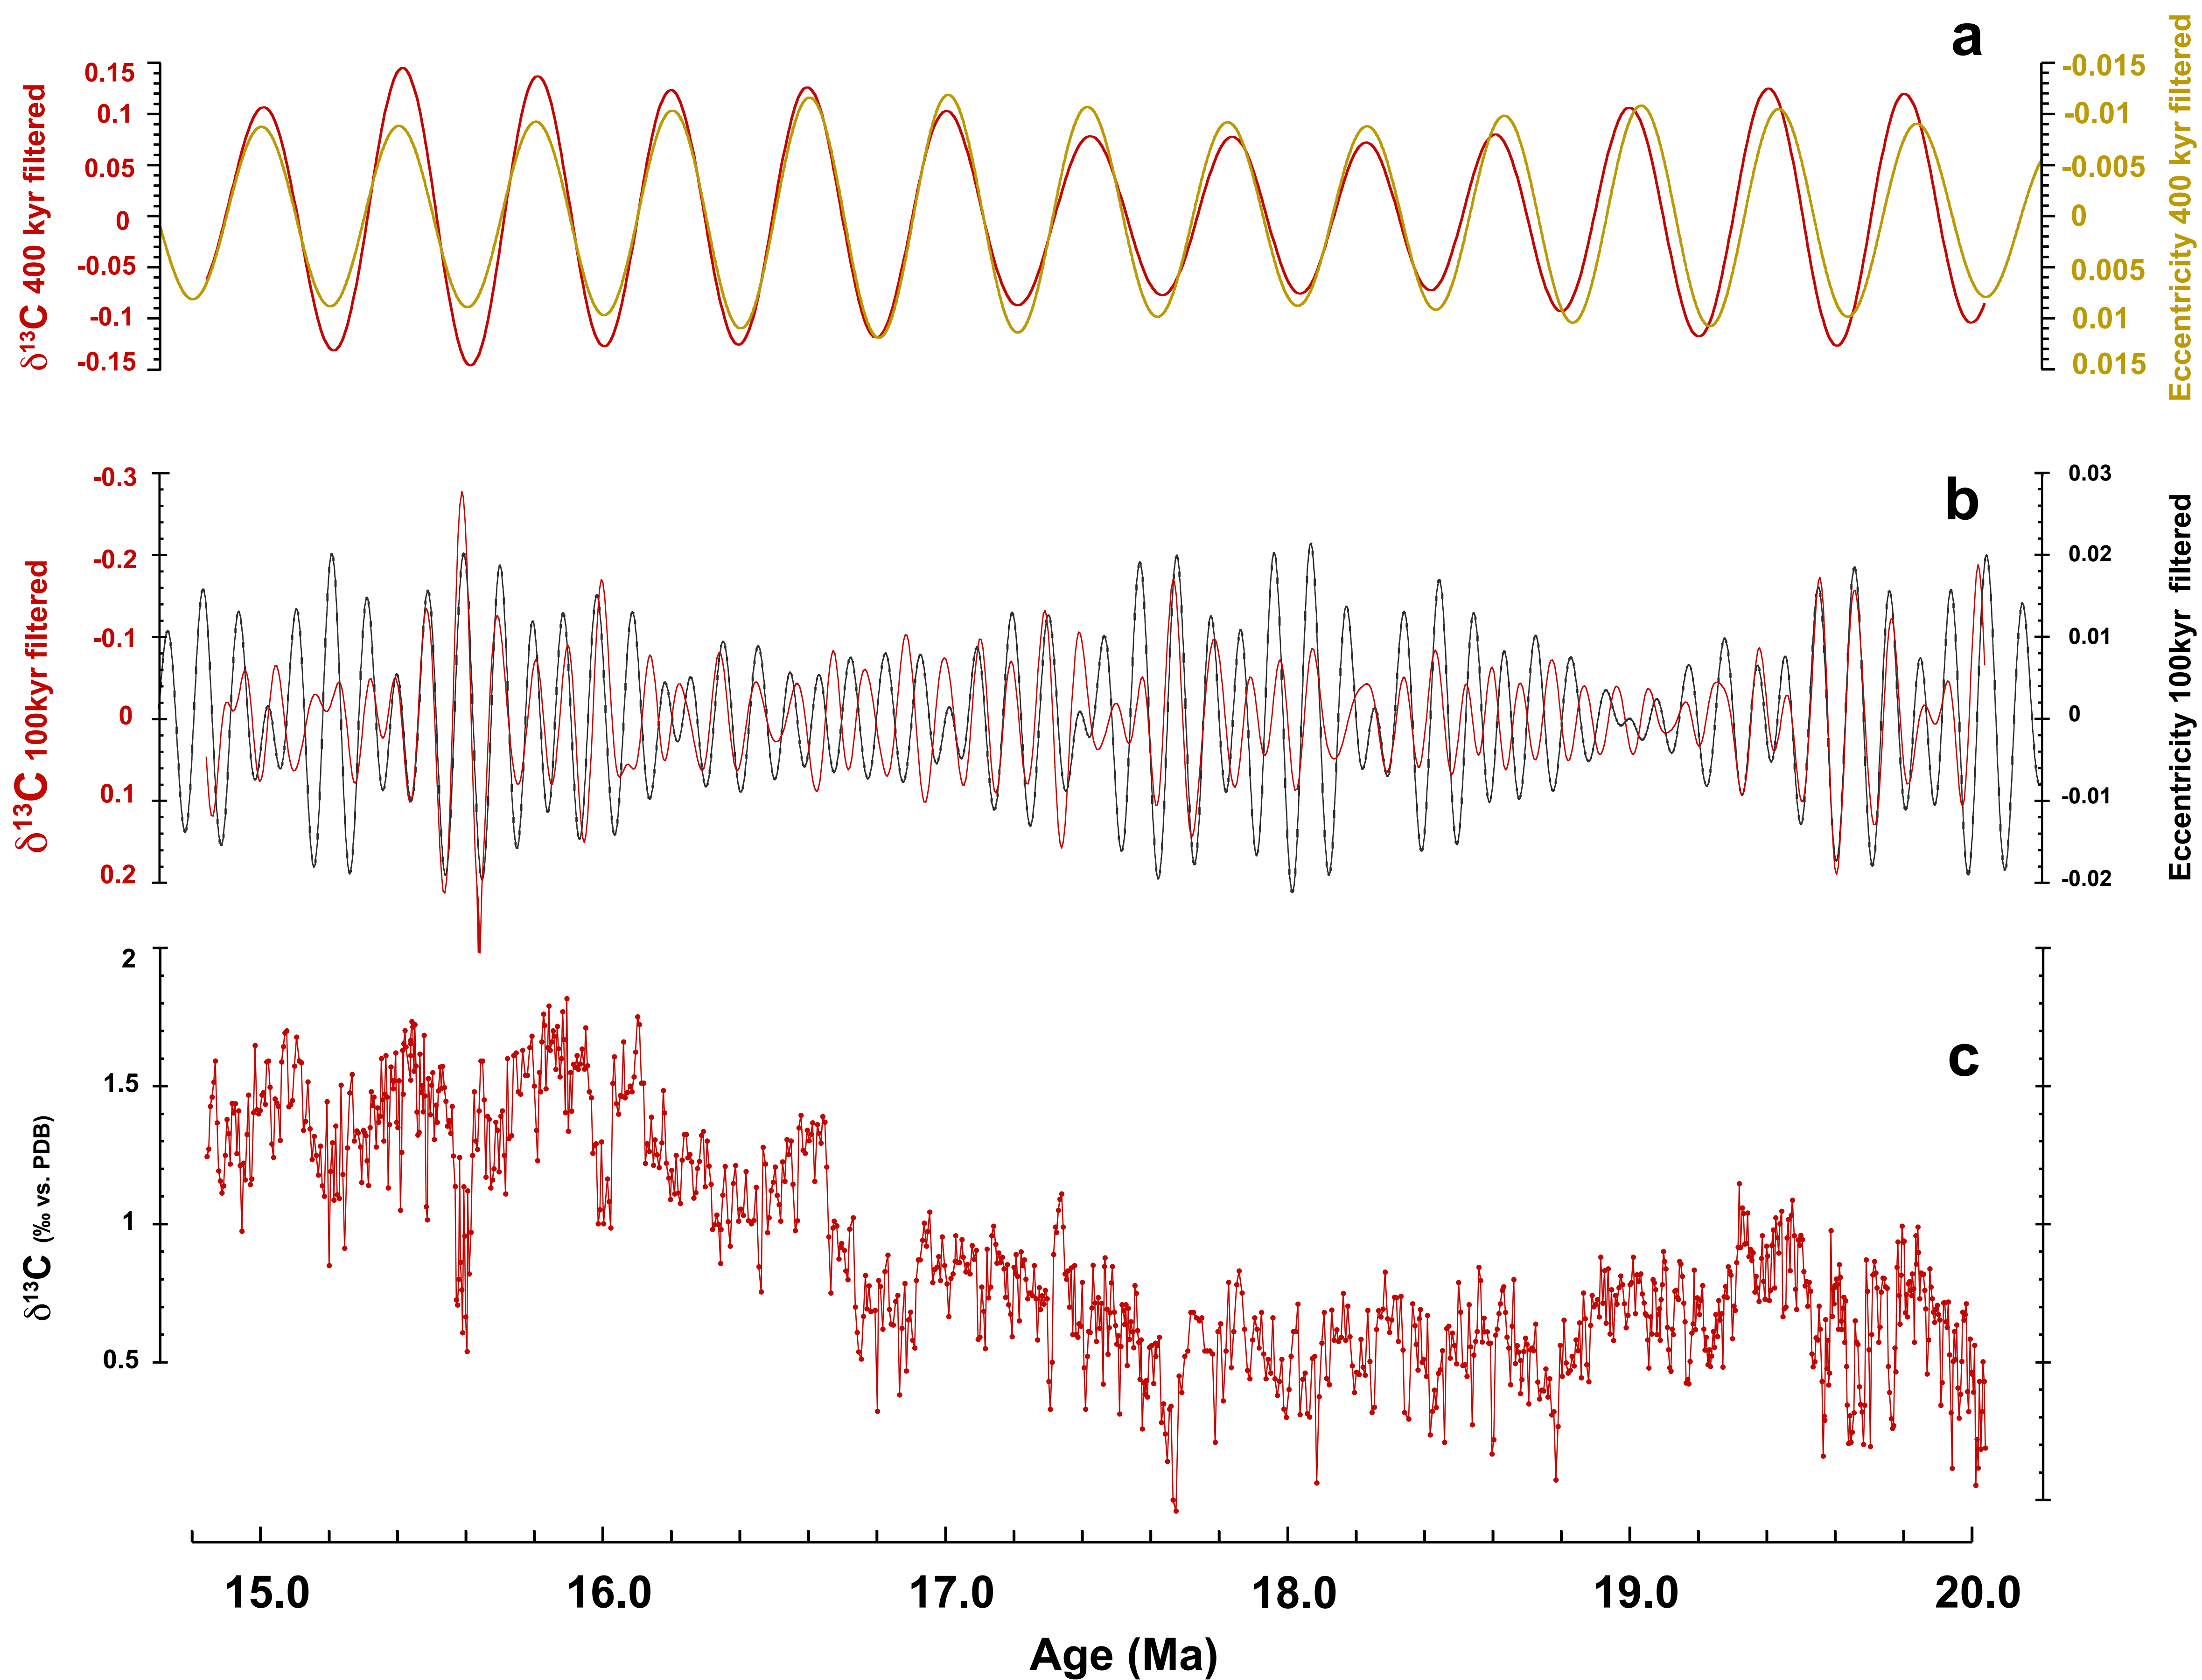

Supplementary Figure S3



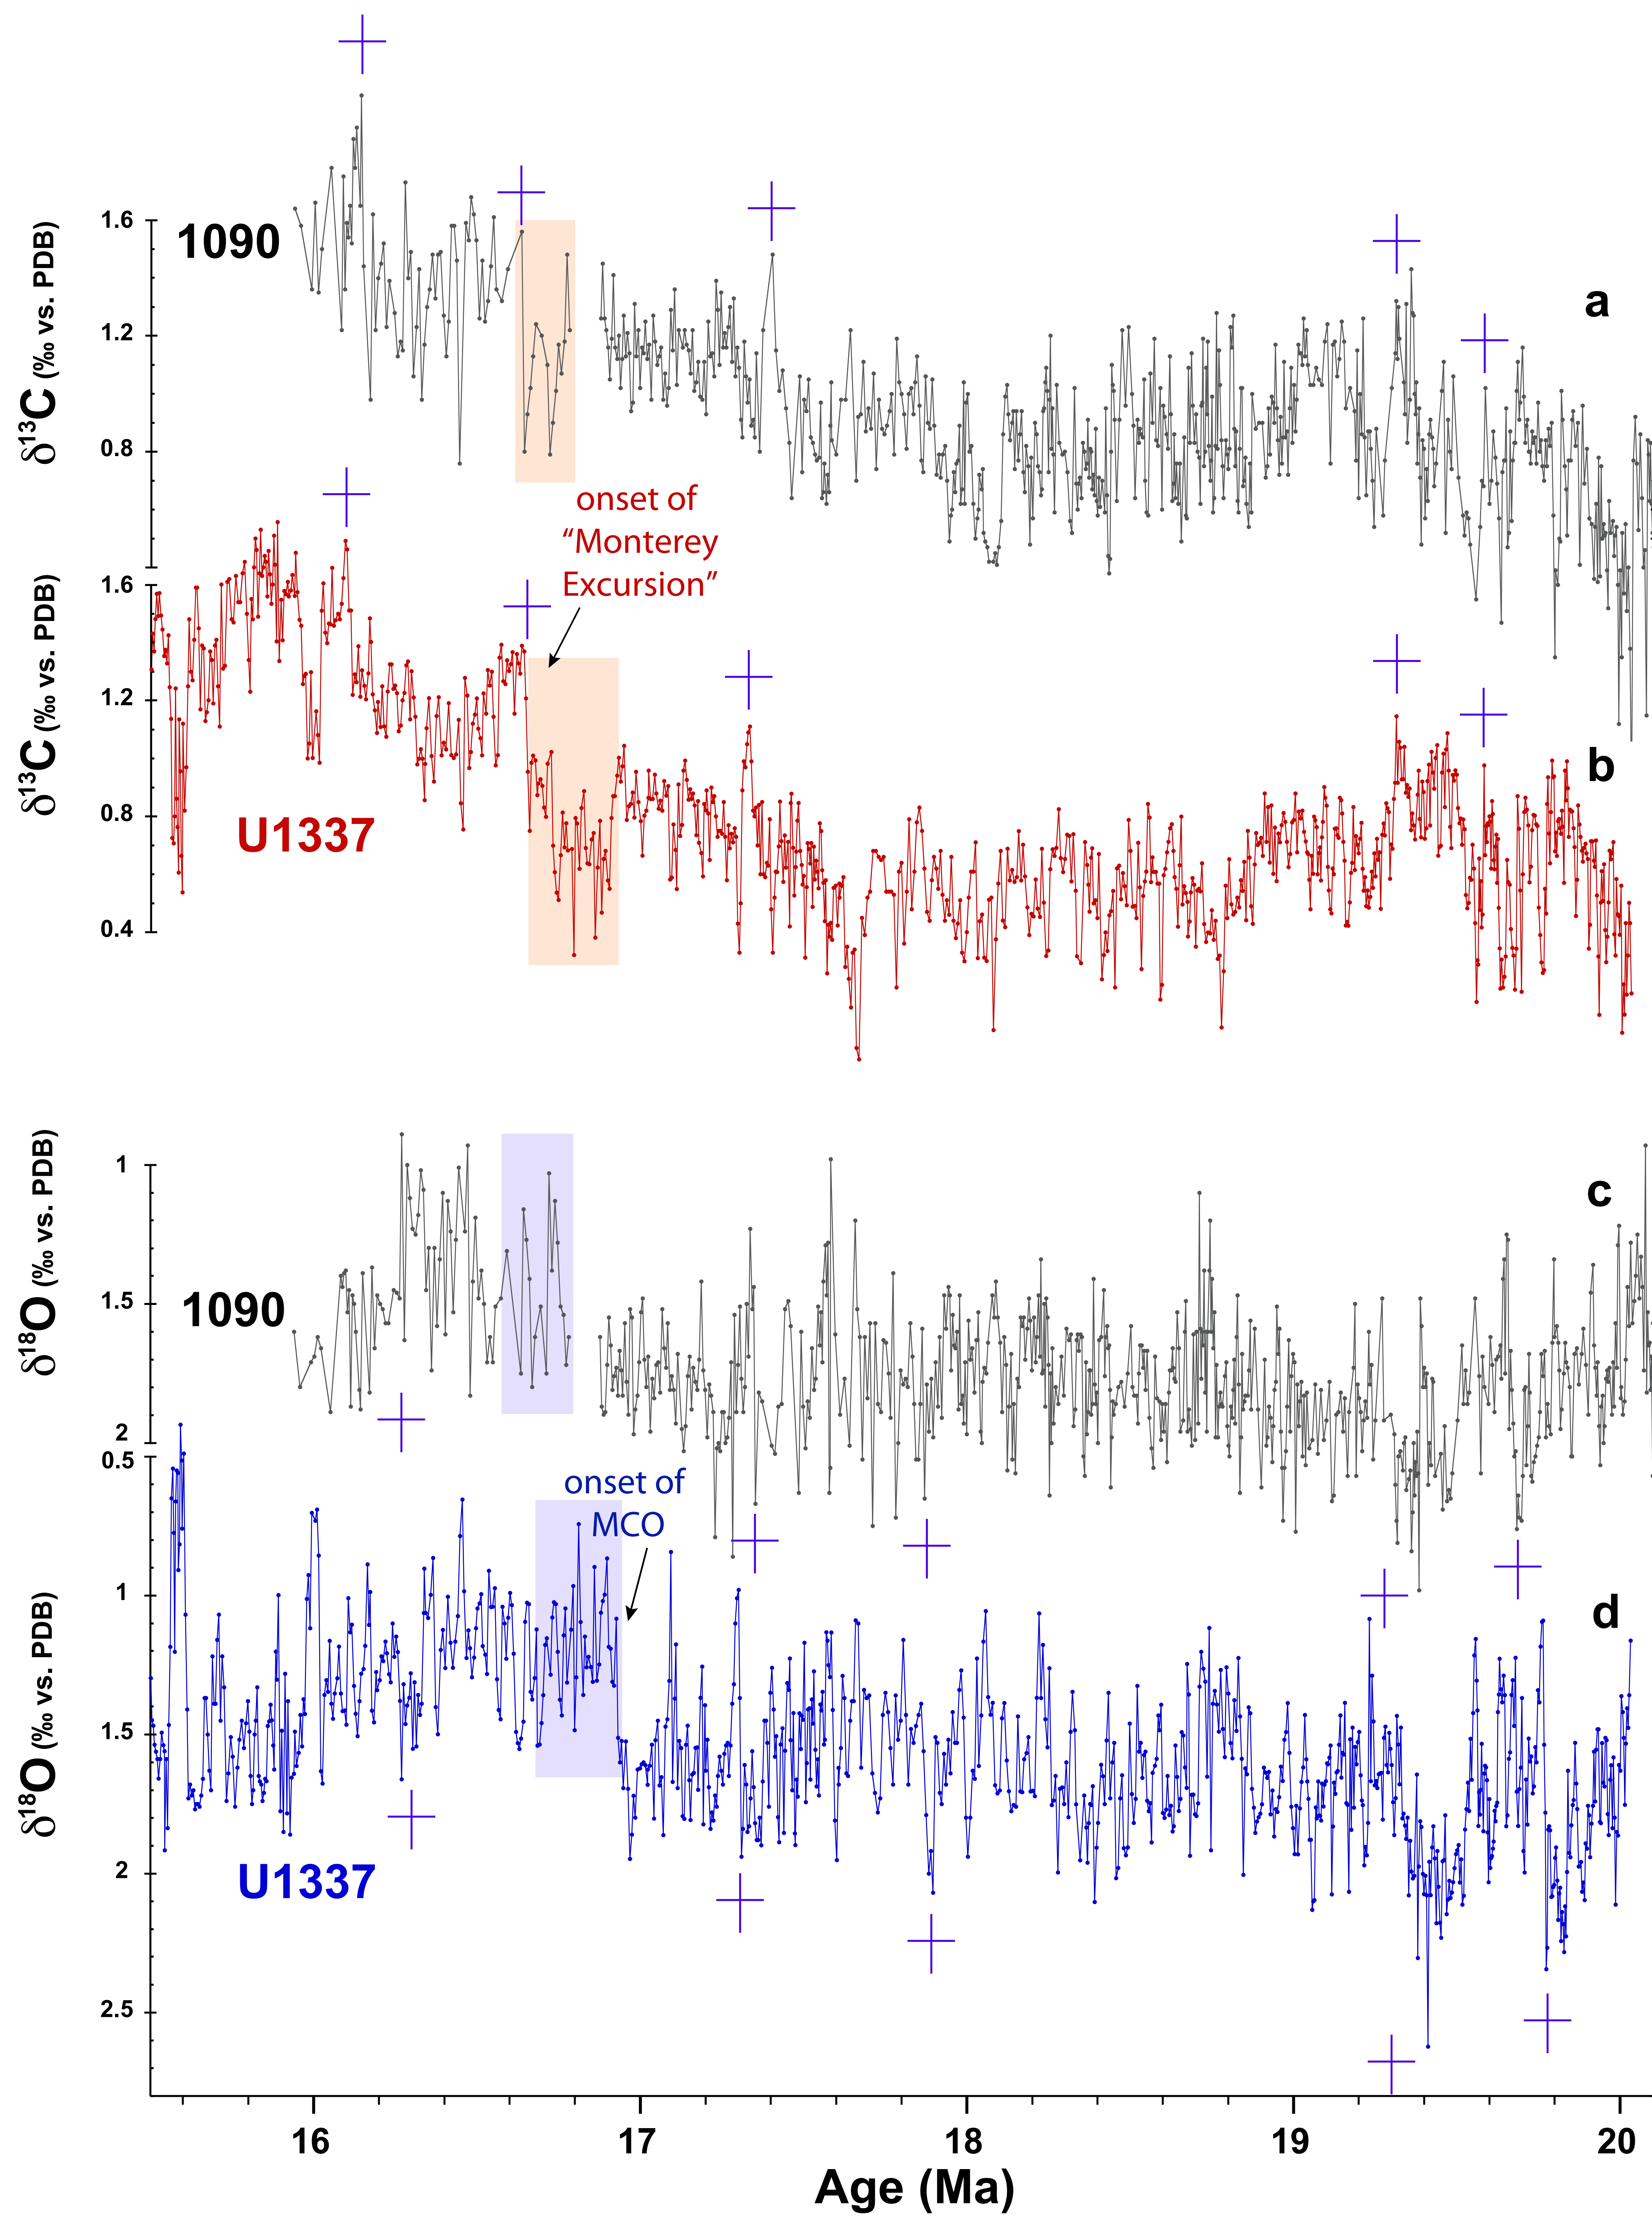

Supplementary Figure S4

**Supplementary Table 1**

| <b>Depth (mcd)</b> | <b>Age (ka)</b> |
|--------------------|-----------------|
| 336.66             | 14949           |
| 339.35             | 15080           |
| 339.96             | 15119           |
| 341.17             | 15194           |
| 341.97             | 15234           |
| 342.72             | 15286           |
| 343.72             | 15325           |
| 345.91             | 15402           |
| 348.52             | 15479           |
| 350.69             | 15569           |
| 351.55             | 15594           |
| 354.15             | 15721           |
| 355.31             | 15799           |
| 357.62             | 15892           |
| 359.9              | 16010           |
| 365.79             | 16341           |
| 367.33             | 16456           |
| 373.5              | 16812           |
| 374.89             | 16898           |
| 375.41             | 16927           |
| 378.21             | 17095           |
| 380.11             | 17189           |
| 382.46             | 17301           |
| 385.76             | 17455           |
| 389.25             | 17585           |
| 390.58             | 17661           |
| 391.35             | 17727           |
| 393.36             | 17884           |
| 394.85             | 17983           |
| 395.95             | 18058           |
| 397.24             | 18150           |
| 400.24             | 18343           |
| 401.82             | 18434           |
| 403.32             | 18523           |
| 407.32             | 18717           |
| 409.25             | 18832           |
| 413.11             | 19035           |
| 416.46             | 19158           |
| 418.39             | 19234           |
| 426.42             | 19558           |
| 429.24             | 19632           |
| 432.51             | 19764           |
| 435.04             | 19841           |
| 437.61             | 19934           |
| 439.73             | 20008           |
